# Supplementary material for: A simple and highly sensitive fluorescence assay for microRNAs
Source: Royal Society of Chemistry journal article supplement (doi:10.1039/c4an02146k), 2015-01-01
Supplement: c4an02146k1.pdf [file c4an02146k1.pdf]

## Supplementary Data

### **A Simple and Highly Sensitive Fluorescence Assay for MicroRNAs**

Wei Shen, Kiat Huei Yeo, and Zhiqiang Gao\*

Department of Chemistry, National University of Singapore, Singapore 117543.

\* Corresponding author, Tel: +65 6516 3887, Fax: +65 6779 1691, e-mail: [chmgaoz@nus.edu.sg](mailto:chmgaoz@nus.edu.sg)

## **Cell culture**

The culture condition for the cell lines is: 5% CO<sub>2</sub>/95% air, 37°C. The growth medium for each cell line is as follows.

HeLa: ATCC-formulated Eagle's Minimum Essential Medium (Catalog No. 30-2003) + 1% penicillin-streptomycin + 10% (vol/vol) fetal bovine serum (FBS)

H1299 (Lung cancer cell): ATCC-formulated RPMI-1640 Medium (Catalog No. 30-2001) + 1% (vol/vol) penicillin-streptomycin + 10% (vol/vol) fetal bovine serum (FBS)

MRC-5 (Normal cell): ATCC-formulated Eagle's Minimum Essential Medium (Catalog No. 30-2003) + 1% penicillin-streptomycin + 10% (vol/vol) fetal bovine serum (FBS)

First, remove and discard the culture medium. Second, rinse the cell with 0.25% (w/v) Trypsin-0.53mM EDTA solution. Add 3 mL of Trypsin-EDTA solution to 75 mL flask and observe cells under an inverted microscope until cells are dispersed (~10min). Then, add 7 mL of growth medium and aspirate cells by gently pipetting. Lastly, transfer aliquots of the cell suspension to new flask and incubate at 37°C.<sup>1-3</sup>

## **MiRNA extraction**

MiRNA extraction from the harvested cells used the miRNeasy Micro Kit from Qiagen (Germany). The extraction procedure followed the manufacturer's quick-start protocol<sup>4</sup> and handbook<sup>5</sup> of miRNeasy Micro Kit.

First, add 700 µL QIAzol Lysis Reagent to the harvested cells and vortex for 1 min to disrupt and homogenize the cells. Incubate at r.t. for 5 min. Add 140 µL chloroform and vortex vigorously for 15s, and place on the benchtop at r.t. for 3min. Centrifuge at 4 °C and transfer the upper aqueous phase to a new tube. Second, add 525 µL 100% ethanol and mix well by pipetting, transfer the sample to the RNeasy MinElute spin column in a 2 mL collection tube. Centrifuge for 15s at r.t. Discard the flow-through. Third, pipet 500 µL buffer RPE onto the RNeasy MinElute spin column to wash and centrifuge. Discard the flow-through again. Fourth, pipet 500 µL of 80% ethanol onto the RNeasy MinElute spin column to wash. Discard the collection tube with the flow-through. Fifth, place the RNeasy MinElute spin column into a new 2 mL collection tube, open the lid of the spin column, centrifuge to dry the membrane. Discard the collection tube with the flow-through. Finally, place the

RNeasy MinElute spin column in a new 1.5 mL collection tube. Add 10  $\mu$ L RNase-free water directly to the center of the membrane. Centrifuge to elute the RNA, and then freeze the RNA for later use.

### **MiRNA quantification**

MiRNA quantification was achieved by the quantitative reverse transcription-PCR (qRT-PCR) using NCode™ EXPRESS SYBR® GreenER™ miRNA qRT-PCR Kits Universal, which includes NCode™ VILO™ miRNA cDNA Synthesis Kit, EXPRESS SYBR® GreenER™ qPCR SuperMix Universal and ROX Reference Dye (Life technologies). The quantification procedure followed the instruction provided by the manufacturer.<sup>6</sup>

Using the NCode™ VILO™ miRNA cDNA Synthesis Kit to synthesize the cDNA:

First, combine 5x Reaction Mix, 10x SuperScript Enzyme Mix, total RNA, and top up to 20  $\mu$ L by adding DEPC-treated water in a tube on ice. Second, vortex to mix and incubate tube at 37°C for 60 min to polyadenylate and reverse-transcribe miRNA, and the first-strand cDNA was synthesized. Last, terminate the reaction at 95°C for 5 min. Hold the reaction at 4°C until use.

Using the EXPRESS SYBR® GreenER™ qPCR SuperMix Universal to quantify miRNA:

First, combine EXPRESS SYBR GreenER Qpcr SuperMix Universal, 10  $\mu$ M miRNA-specific forward primer, 10  $\mu$ M Universal qPCR Primer, 25  $\mu$ M ROX Reference Dye, undiluted cDNA, and top up to 20  $\mu$ L by adding DEPC-treated water in a tube on ice. Second, prepare no-template control to test for DNA contamination of the enzyme/primer mixes, and gently mix well. Last, put into the real-time instrument, run the program, collect data and analyze the results.

Cycling program: 50°C for 2 min → 95°C for 2 min → 40 cycles of 95°C for 15 s and 60°C for 1 min.

Table S-1. Sequences of synthetic oligonucleotides used in the project

| Name           | Sequence (5' - 3')                                                                |
|----------------|-----------------------------------------------------------------------------------|
| Probe          | 5'-/5Biosg/T <sub>9</sub> AAC TAT ACA ACC TAC TAC CTC AT <sub>9</sub> /36-FAM/-3' |
| Let-7a (miRNA) | 5'-UGA GGU AGU AGG UUG UAU AGU U-3'                                               |
| Let-7f (miRNA) | 5'-UGA GGU AGU AG <u>A</u> UUG UAU AGU U-3'                                       |
| Let-7d (miRNA) | 5'- <u>A</u> GA GGU AGU AGG UUG <u>C</u> AU AGU U-3'                              |
| dT21           | 5'-TTT TTT TTT TTT TTT TTT TTT-3'                                                 |

Table S-2. Composition of all buffers used in the project

| Buffer                                                   | Composition                                                                                     |
|----------------------------------------------------------|-------------------------------------------------------------------------------------------------|
| 1× Binding and Washing Buffer (1× B&W)                   | 5.0 mM Tris-HCl, 0.5 mM EDTA, 1.0 M NaCl, pH 7.5                                                |
| 2× Binding and Washing Buffer (2× B&W)                   | 10 mM Tris-HCl, 1.0 mM EDTA, 2.0 M NaCl, pH 7.5                                                 |
| Hybridization Buffer (for Mg <sup>2+</sup> Optimization) | 50 mM Tris-HCl, pH 7.54:<br>Vary concentration of MgCl <sub>2</sub> in buffer from 5.0 to 40 mM |
| Hybridization Buffer (for pH Optimization)               | 50 mM Tris-HCl, 25 mM MgCl <sub>2</sub> :<br>Vary pH of buffer from 6.5 to 9.0                  |
| Optimized Hybridization Buffer                           | 50 mM Tris-HCl, 25 mM MgCl <sub>2</sub> , pH 8.0                                                |

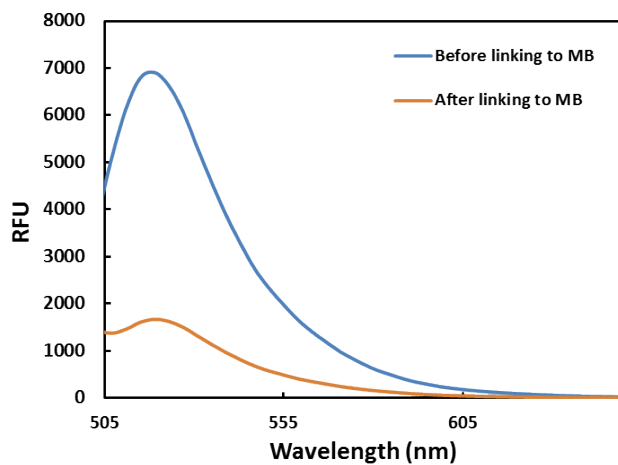

Figure S-1. The fluorescence intensities of the remained BF oligonucleotides solution before and after linking BF oligonucleotides to the MBs.

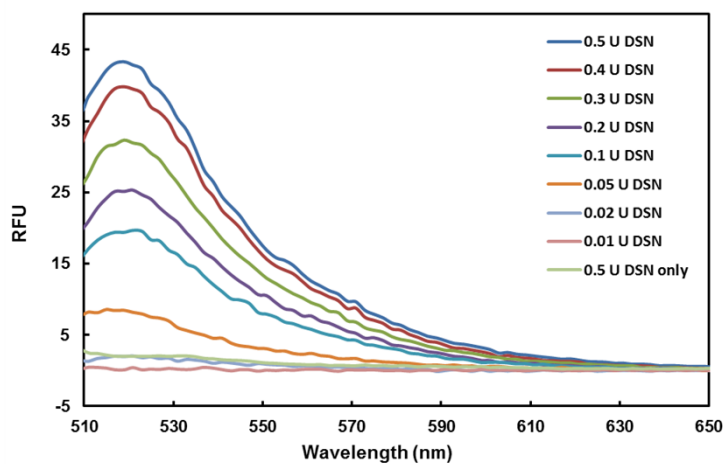

Figure S-2. Optimization of DSN dosage from 0.01 U to 0.5 U. Condition: 20 mM  $Mg^{2+}$ , pH 7.5, 55°C, 30 min incubation.

1. HeLa. <http://www.atcc.org/Products/All/CCL-2.aspx#culturemethod> (accessed 9th September, 2014).
2. H1299. <http://www.atcc.org/products/all/CRL-5803.aspx#culturemethod> (accessed 9th September, 2014).
3. MRC-5. <http://www.atcc.org/Products/All/CCL-171.aspx#culturemethod> (accessed 9th September, 2014).
4. Protocol. <http://www.qiagen.com/resources/resourcedetail?id=a7967938-edf9-4d36-a9a3-9a3d08d2c50f&lang=en> (accessed 9th September, 2014).
5. Handbook. <http://www.qiagen.com/resources/resourcedetail?id=9dfe7ebc-45a2-4b1e-9ea3-d7c5ac264e00&lang=en> (accessed 9th September, 2014).
6. NCode™ EXPRESS SYBR® GreenER™ miRNA qRT-PCR Kit universal. <http://www.lifetechnologies.com/order/catalog/product/A11193051?ICID=search-productMI> (accessed 9th September, 2014).
